# Supplementary material
Source: PubMed Central journal article supplement (PMC5503758)
Supplement: NIHMS866897-supplement-supplement_1.pdf [file NIHMS866897-supplement-supplement_1.pdf]

Table E1: Baseline Demographics of overall study population

| Characteristic                                           | Overall<br>(n= 388) | Pediatric<br>(n= 151) | Adult<br>(n= 237) | P-Value* |
|----------------------------------------------------------|---------------------|-----------------------|-------------------|----------|
| Age                                                      | 27 (12, 44)         | 11 (9, 14)            | 41 (29, 52)       | <.001    |
| Male                                                     | 177 (46%)           | 98 (65%)              | 79 (33%)          | <.001    |
| Race or ethnic group (%)                                 |                     |                       |                   |          |
| White                                                    | 153 (40%)           | 46 (30%)              | 107 (45%)         | 0.009    |
| Black                                                    | 154 (40%)           | 64 (42%)              | 90 (38%)          |          |
| Hispanic                                                 | 65 (17%)            | 35 (23%)              | 30 (13%)          |          |
| Other                                                    | 15 (4%)             | 6 (4%)                | 9 (4%)            |          |
| Currently Using Controller Medications, N (%)            | 278 (72%)           | 118 (78%)             | 160 (68%)         | 0.023    |
| Spirometry, median (Q1, Q3)                              |                     |                       |                   |          |
| % predicted FEV <sub>1</sub>                             | 85 (74, 96)         | 89 (80, 97)           | 83 (70, 93)       | <.001    |
| % predicted FVC                                          | 95 (86, 106)        | 100 (91, 111)         | 93 (83, 103)      | <.001    |
| FEV <sub>1</sub> /FVC                                    | 0.75 (0.69, 0.81)   | 0.78 (0.72, 0.83)     | 0.73 (0.67, 0.78) | <.001    |
| Patient reported outcomes, median (Q1, Q3)               |                     |                       |                   |          |
| ACT (range 5-25) ↑ <sup>†</sup>                          | 17 (14, 19)         | 17 (15, 19)           | 16 (14, 19)       | 0.033    |
| cACT (range 0-27) ↑ <sup>†</sup>                         | 17 (15, 19)         | 17 (15, 19)           | n/a               | n/a      |
| ASUI ↑                                                   | 0.78 (0.69, 0.88)   | 0.79 (0.7, 0.89)      | 0.77 (0.68, 0.88) | 0.29     |
| Sinus Symptom score (range, 1-60) ↓                      | 25 (17, 33)         | 24 (14, 30)           | 26 (18, 36)       | 0.008    |
| SNOT22 (range 0-120) ↓ <sup>‡</sup>                      | n/a                 | n/a                   | 37 (21, 53)       | n/a      |
| SN-5 (range 1-7) ↓ <sup>‡</sup>                          | n/a                 | 3.6 (2.8, 4.6)        |                   | n/a      |
| Skin Test Allergy to weed or ragweed, N(%) <sup>††</sup> | 137 (40%)           | 46 (25%)              | 91 (44%)          | 0.10     |

\* Categorical P-Values are based upon Chi-Square test and continuous P-Values from are based upon Kruskal-Wallis tests

<sup>†</sup>ACT for participants ≥ 12 years (n = 301, 65 of whom are children), cACT for 6-11 years (n = 86).

<sup>‡</sup>SNOT 22 for participants ≥ 18 years (n = 229), SN-5 for 6-17 years (n = 150).

\*\*1 subject missing spirometry; 2 subjects missing ASUI; 2 subjects missing Sinus Symptom Score; Twenty-four individuals were missing the skin test in each group.

<sup>††</sup> Skin test allergy is defined as a positive wheel ≥ 3mm than the control wheel.

Q1 = 1<sup>st</sup> quartile; Q3 = 3<sup>rd</sup> quartile; FEV<sub>1</sub>= Forced Expiratory Volume in 1 second in Liters; FVC = Forced Vital Capacity; total amount of air exhaled during FEV test; ACT = Asthma Control Test; cACT = Child Asthma Control Test, ASUI =Asthma Symptom Utility Index, SNOT-22 = Sinonasal Outcome Test 22, SN-5 = Sinonasal Survey 5. ↑high score indicative of better control; ↓low score indicative of better control

Table E2: Baseline characteristics based on skin test allergic reaction to weeds (>3 mm positive-control) on 340 individuals with test information available\*.

| Characteristic                                | Not Allergic*<br>(N = 203) | Allergic*<br>(N = 137) | P-Value <sup>†</sup> |
|-----------------------------------------------|----------------------------|------------------------|----------------------|
| Age, median (Q1, Q3)                          | 25 (11, 45)                | 28 (15, 43)            | 0.26                 |
| Male, N(%)                                    | 82 (40%)                   | 74 (54%)               | 0.013                |
| Race or ethnic group, N (%)                   |                            |                        |                      |
| White                                         | 67 (33%)                   | 62 (46%)               | 0.06                 |
| Black                                         | 86 (42%)                   | 54 (40%)               |                      |
| Hispanic                                      | 41 (20%)                   | 17 (13%)               |                      |
| Other                                         | 9 (4%)                     | 3 (2%)                 |                      |
| Currently Using Controller Medications, N (%) | 147 (72%)                  | 90 (66%)               | 0.19                 |
| Spirometry, median (Q1, Q3)                   |                            |                        |                      |
| % predicted FEV <sub>1</sub>                  | 84 (73, 95)                | 87 (74, 94)            | 0.75                 |
| % predicted FVC                               | 95 (84, 106)               | 96 (86, 105)           | 0.64                 |
| FEV <sub>1</sub> /FVC                         | 0.75 (0.68, 0.80)          | 0.74 (0.69, 0.81)      | 0.74                 |
| Patient reported outcomes, median (Q1, Q3)    |                            |                        |                      |
| ACT (range 5-25) ↑ <sup>‡</sup>               | 17 (15, 18)                | 16 (14, 18)            | 0.20                 |
| cACT (range 0-27) ↑ <sup>‡</sup>              | 17 (14, 18)                | 17 (16, 19)            | 0.94                 |
| ASUI                                          | 0.76 (0.69, 0.88)          | 0.78 (0.69, 0.86)      | 0.97                 |
| Sinus Symptom score (range, 1-60) ↓           | 27 (19, 34)                | 23 (16, 31)            | 0.020                |
| SNOT22 (range 0-120) ↓ <sup>**</sup>          | 44 (24, 59)                | 34 (21, 50)            | 0.050                |
| SN-5 (range 1-7) ↓ <sup>**</sup>              | 3.6 (3, 4.6)               | 3.5 (2.8, 4.0)         | 0.22                 |

\*48 patients were missing skin test results and therefore could not be assigned to allergic or non-allergic

<sup>†</sup>P-values for categorical variables are based upon Chi-Square tests and p-values for continuous variables are based upon Kruskal-Wallis tests

<sup>‡</sup>ACT for participants ≥ 12 years, cACT for 6-11 years. The table lists all of the child results in child column (n=86) and all of the adult results in adult column (n=301)

\*\*SNOT 22 for participants ≥ 18 years, SN-5 for 6-17 years

Q1 = 1<sup>st</sup> quartile; Q3 = 3<sup>rd</sup> quartile; FEV<sub>1</sub> = Forced Expiratory Volume in 1 second in Liters; FVC = Forced Vital Capacity; total amount of air exhaled during FEV test; ACT = Asthma Control Test; cACT = Child Asthma Control Test, ASUI = Asthma Symptom Utility Index, SNOT-22 = Sinonasal Outcome Test 22, SN-5 = Sinonasal Survey 5. ↑ high score indicative of better control; ↓ low score indicative of better control

Table E3: Baseline Demographics Pollen Study Clinics' Participants Who Have Positive Skin Test to Weeds residing in a location *with a defined weed season*

| Characteristic                             | Placebo<br>(N = 48) | Mometasone<br>(N = 34) | P-value* |
|--------------------------------------------|---------------------|------------------------|----------|
| Mean age (Yrs)                             | 32 (17, 44)         | 26 (14, 37)            | 0.44     |
| Age < 18 (%)                               | 13 (27%)            | 13 (38%)               | 0.29     |
| Male (%)                                   | 22 (46%)            | 17 (50%)               | 0.71     |
| Race or ethnic group (%)                   |                     |                        |          |
| White                                      | 26 (54%)            | 15 (44%)               | 0.84     |
| Black                                      | 20 (42%)            | 17 (50%)               |          |
| Hispanic                                   | 1 (2%)              | 1 (3%)                 |          |
| Other                                      | 1 (2%)              | 1 (3%)                 |          |
| Second-hand smoke (%)                      | 11 (23%)            | 7 (21%)                | 0.80     |
| Using Controller Medication                | 37 (77%)            | 24 (71%)               | 0.51     |
| Spirometry, median (Q1, Q3)                |                     |                        |          |
| % predicted FEV <sub>1</sub>               | 83 (75, 92)         | 88 (78, 99)            | 0.15     |
| % predicted FVC                            | 94 (86, 104)        | 97 (89, 104)           | 0.41     |
| FEV <sub>1</sub> /FVC                      | 0.74 (0.67, 0.81)   | 0.78 (0.71, 0.81)      | 0.28     |
| Patient reported outcomes, median (Q1, Q3) |                     |                        |          |
| ACT (range 5-25) ↑ †                       | 16 (13, 19)         | 16 (14, 19)            | 0.82     |
| cACT (range 0-27) ↑ †                      | 17 (16, 19)         | 18 (17, 19)            | 0.80     |
| ASUI (range: 0-1)                          | 0.79 (0.69, 0.88)   | 0.82 (0.7, 0.88)       | 0.87     |
| Sinus symptom score(range, 1-60) ↓         | 22 (14, 34)         | 24 (17, 30)            | 0.92     |
| SNOT22 (range 0-120) ↓ ‡                   | 25 (20, 56)         | 29 (21, 44)            | 0.76     |
| SN-5 (range 1-7) ↓ ‡                       | 3.6 (2.6, 4.4)      | 3.4 (2.4, 3.8)         | 0.37     |

\*P-values for categorical variables are based upon Chi-Square tests and p-values for continuous variables are based upon Kruskal-Wallis tests

†ACT for participants ≥ 12 years, cACT for 6-11 years

‡SNOT 22 for participants ≥ 18 years, SN-5 for 6-17 years

Q1 = 1<sup>st</sup> quartile; Q3 = 3<sup>rd</sup> quartile; FEV<sub>1</sub> = Forced Expiratory Volume in 1 second in Liters; FVC = Forced Vital Capacity; total amount of air exhaled during FEV test; ACT = Asthma Control Test; cACT = Child Asthma Control Test, ASUI = Asthma Symptom Utility Index, SNOT-22 = Sinonasal Outcome Test 22, SN-5 = Sinonasal Survey 5. ↑ high score indicative of better control; ↓ low score indicative of better control

Table E4: Rates of Episodes of Poorly Controlled Asthma, and Daily Asthma and Rhinitis Symptoms for participants allergic to weeds “Out” of Season compared to “In” Season

| <b><i>Asthma Event type</i></b>              |                                                               |                             |
|----------------------------------------------|---------------------------------------------------------------|-----------------------------|
| <b>Rates*</b>                                | Relative Risk<br>In season to out of season<br>Mean (95% CI)* | P-Value*                    |
| <b>EPACS overall</b>                         | 1.27 (0.60, 2.66)                                             | 0.53                        |
| <b>↓ Peak Flow exacerbation</b>              | 1.63 (0.49,5.43)                                              | 0.43                        |
| <b>↑ Rescue Medications</b>                  | 1.02 (0.37, 2.83)                                             | 0.96                        |
| <b>Oral Steroids</b>                         | †                                                             | †                           |
| <b><i>Asthma Symptoms</i></b>                |                                                               |                             |
| <b>% Characteristics</b>                     | Coefficient Estimate‡<br>For being in season<br>Mean (95% CI) | P-Value‡<br>Between seasons |
| <b>% Asthma Symptom free days</b>            | -4.03 (-9.79, 01.73)                                          | 0.17                        |
| <b>% Nights with awakenings from asthma</b>  | 4.90 (-0.19, 10.00)                                           | 0.06                        |
| <b><i>Rhinitis Symptoms</i></b>              |                                                               |                             |
| <b>% Rhinitis Symptom Free days</b>          | -1.46 (-5.56, 2.65)                                           | .49                         |
| <b>% Rhinitis Medication Rescue use days</b> | †                                                             | †                           |

\*Rate ratios and p-values are calculated from a negative binominal model with repeated subjects.

† There were no oral steroid exacerbations or sinus medication use in season for individuals who were in season

‡ Values based upon linear regression with repeated subject

The coefficient estimate is like interpreting a linear regression. If someone is in season you would expect a 4% decrease in percent symptom free days. However all of the 95% confidence intervals for the coefficients contain 0 (Not significant).
